# Supplementary material
Source: publisher site journal article supplement (https://www.spandidos-publications.com/8122/downloadSupplementary)
Supplement: Supplementary file 1 [file downloadSupplementary]

**Table SI.** The URLs of databases.

| <b>Database</b>       | <b>URL</b>                                                                                                |
|-----------------------|-----------------------------------------------------------------------------------------------------------|
| TCMSP                 | <a href="http://tcmspw.com/tcmsp.php">http://tcmspw.com/tcmsp.php</a>                                     |
| DrugBank              | <a href="https://go.drugbank.com/">https://go.drugbank.com/</a>                                           |
| SwissTargetPrediction | <a href="http://www.swisstargetprediction.ch/about.php">http://www.swisstargetprediction.ch/about.php</a> |
| PharmMapper           | <a href="https://www.lilab-ecust.cn/pharmmapper/">https://www.lilab-ecust.cn/pharmmapper/</a>             |
| GeneCards             | <a href="https://www.genecards.org/">https://www.genecards.org/</a>                                       |
| NCBI                  | <a href="https://www.ncbi.nlm.nih.gov/">https://www.ncbi.nlm.nih.gov/</a>                                 |
| OMIM                  | <a href="http://www.omim.org/">http://www.omim.org/</a>                                                   |
| DisGeNET              | <a href="https://www.disgenet.org/">https://www.disgenet.org/</a>                                         |
| Bioinformatics        | <a href="https://www.bioinformatics.com.cn/">https://www.bioinformatics.com.cn/</a>                       |
| DAVID                 | <a href="https://david.ncifcrf.gov/">https://david.ncifcrf.gov/</a>                                       |
